# Supplementary material for: Measurements of the fetal heart and prenatal biomarkers in children born with an isolated ventricular septum defect – a large, prospective, multicenter cohort study
Source: publisher site journal article supplement (doi:10.1515/jpm-2025-0167), 2025-07-24
Supplement: Supplementary file 1 [file j_jpm-2025-0167_suppl_001.docx]

Supplementary Table 1: The mean sizes of the cardiac structures, 1st- and 2nd-trimester biometries, and pregnancy outcome in fetuses with a neonatally detected small (<3 mm) VSD or large (≥3 mm) VSD compared to fetuses without a heart malformation

| **Heart biometries** | | **VSD<3 mm**  **(n=218)**  **n (%)** | | **VSD≥3 mm**  **(n=45)**  **n(%)** | | **Mean difference between muscular VSD group and control group adjusted for gestational age**  **(95% confidence interval)** | | **Mean difference between perimembranous, inlet and outlet VSD group and control group adjusted for gestational age**  **(95% confidence interval)** |
| --- | --- | --- | --- | --- | --- | --- | --- | --- |
| Aortic valve diameter, mm (SD) | | 125 (57.3) | 3.0 (0.3) | 32 (71.1) | 3.0 (0.3) | -0.04 (-0.09;0.01) | | -0.04 (-0.14;0.06) |
| Ascending aorta in 3-vessel view, mm (SD) | | 170 (78.0) | 3.5 (0.4) | 33 (73.3) | 3.4 (0.4) | 0.00 (-0.06;0.07) | | -0.01 (-0.15;0.13) |
| Aortic isthmus in sagittal view, mm (SD) | | 29 (13.3) | 3.4 (0.5) | 7 (15.6) | 3.4 (0.5) | 0.09 (-0.07;0.25) | | -0.03 (-0.35;0.29) |
| Pulmonary valve diameter, mm (SD) | | 164 (75.2) | 3.9 (0.4) | 32 (71.1) | 4.0 (0.4) | 0.01 (-0.05;0.07) | | 0.10 (-0.03;0.24) |
| Left ventricular length, mm (SD) | | 101 (46.3) | 11.3 (1.4) | 20 (44.4) | 10.9 (1.5) | -0.12 (-0.39;0.16) | | -0.40 (-1.01;0.22) |
| Right ventricular length, mm (SD) | | 101 (46.3) | 5.7 (0.8) | 20 (44.4) | 5.7 (0.7) | -0.06 (-0.23;0.10) | | -0.13 (-0.51;0.25) |
| Left ventricular width, mm (SD) | | 101 (46.3) | 6.3 (0.9) | 20 (44.4) | 6.2 (1.1) | -0.01 (-0.16;0.15) | | -0.13 (-0.48;0.23) |
| Right ventricular width, mm (SD) | | 101 (46.3) | 5.8 (0.8) | 20 (44.4) | 5.9 (0.8) | 0.01 (-0.17;0.15) | | 0.10 (-0.25;0.45) |
| Heart length, mm (SD) | | 101 (46.3) | 19.1 (1.6) | 20 (44.4) | 18.2 (1.8) | 0.04 (-0.29;0.37) | | -0.75 (-1.47;-0.02) |
| Heart width, mm (SD) | | 101 (46.3) | 13.6 (1.3) | 20 (44.4) | 13.4 (1.8) | -0.06 (-0.34;0.21) | | -0.17 (-0.77;0.46) |
| Axis of heart in the thorax, degrees (SD) | | 48 (22.0) | 46.1 (6.5) | 9 (20.0) | 46.8 (7.0) | 1.44 (-0.62;3.50) | | 2.18 (-2.53;6.89) |
| Ductus venosus pulsatility index (SD) | | 51 (23.4) | 0.70 (0.1) | 14 (31.1) | 0.78 (0.2) | -0.02 (-0.07;0.03) | | 0.06 (-0.03;0.16) |
| Umbilical artery pulsatility index (SD) | | 78 (35.8) | 1.18 (0.2) | 17 (37.8) | 1.22 (0.1) | -0.03 (-0.07;0.01) | | 0.01 (-0.07;0.10) |
| **Other biometries** | | | | | | | | |
|  | 1st trimester | | | | | | | |
| CRL, mm (SD) | | 208 (95.4) | 65.5 (7.6) | 41 (91.1) | 66.8 (6.4) | -0.07 (-0.23;0.08) | -0.10 (-0.46;0.25) | |
| NT thickness≥3.5 mm, n(%) | | 208 (95.4) | 2 (1.0) | 41 (91.1) | 0 (0.0) | *p*=0.3 | *p*=0.7 | |
| Ductus venosus pulsatility index, (SD) | | 55 (25.2) | 1.0 (0.1) | 16 (35.6) | 1.0 (0.1) | 0.01 (-0.03;0.06) | 0.02 (-0.06;0.09) | |
| β-hCG, MoM (median (IQR)) | | 208 (95.4) | 1.08 (0.8-1.5) | 41 (91.1) | 1.11 (0.7-1.6) | 0.01 (-0.09;0.12) | 0.03 (-0.21;0.27) | |
| PAPP-A, MoM (median (IQR)) | | 208 (95.4) | 1.01 (0.7-1.5) | 41 (91.1) | 0.95 (0.7-1.5) | 0.00 (-0.09;0.09) | -0.11 (-0.32;0.09) | |
|  | 2nd trimester | | | | | | | |
| Biparietal diameter, mm (SD) | | 214 (98.2) | 48.1 (2.4) | 45 (100) | 47.7 (3.1) | -0.03 (-0.32;0.26) | -0.47 (-1.10;0.16) | |
| Abdominal circumference, mm (SD) | | 209 (95.9) | 152.8 (8.1) | 45 (100) | 150.4 (8.5) | 1.04 (0.07;2.00) | -1.48 (-3.53;0.59) | |
| Femur length, mm (SD) | | 210 (96.3) | 32.0 (1.6) | 45 (100) | 32.0 (1.9) | 0.06 (-0.13;0.26) | 0.06 (-0.36;0.47) | |
|  | Obstetric outcome | | | | | | | |
| Gestational age at delivery (median (IQR)) | | 218 (100) | 281 (274-286) | 45 (100) | 283 (275-289) | -0.3 (-1.8;1.2) | 2.5 (-0.8;5.8) | |
| Birthweight (median (IQR)) | | 218 (100) | 3544 (537) | 45 (100) | 3445 (407) | 48 (-21;117) | -51 (-201;99) | |
| Fetal growth restriction, n(%) | | 218 (100) | 5 (2.3) | 45 (100) | 2 (4.4) | *p*>0.9 | *p*=0.3 | |

VSD – ventricular septum defect

SD – standard deviation

CRL – crown rump length

NT – nuchal translucency

β-hCG – free β-human chorion gonadotropin

IQR – interquartile range

PAPP-A – pregnancy associated plasma protein A

MoM – multiple of the median
